# Supplementary material for: miR-22-3p and miR-30e-5p Are Associated with Prognosis in Cervical Squamous Cell Carcinoma
Source: MDPI journal article supplement (doi:10.3390/ijms23105623), 2022-05-17
Supplement: s1 [file s1]

## Supplementary Files

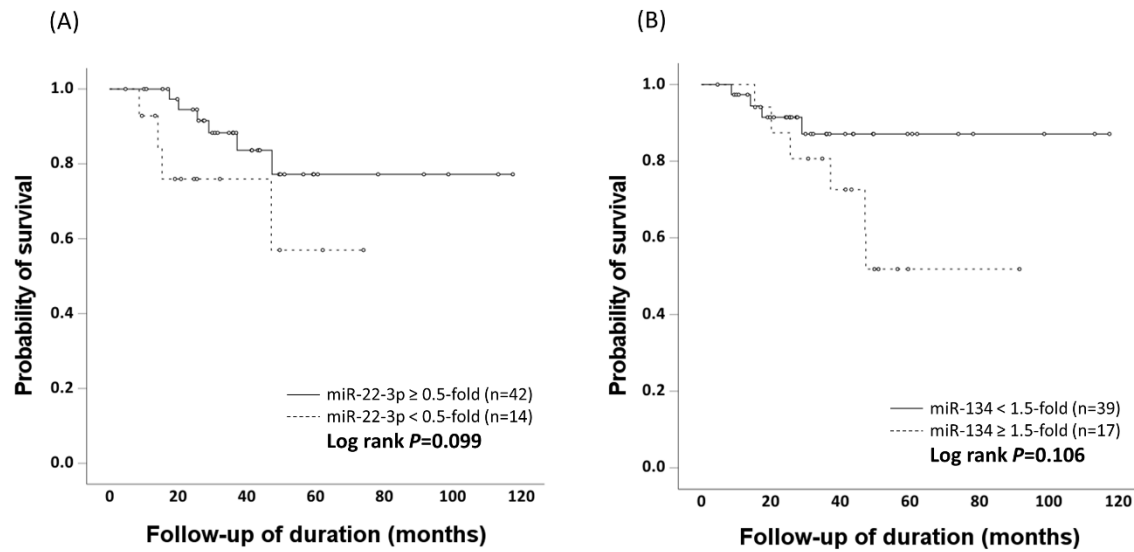

**Figure S1.** Kaplan-Meier survival curves according to miR-22-3p and miR-134 expression in 56 cases of cervical SqCC. Both miR-22-3p and miR-134 do not show significant difference in OS analysis (downregulation of miR-22-3p,  $<0.5$ -fold relative to the normal epithelium (NC) level, log rank=0.099; and up-regulation of miR-134,  $\geq 1.5$ -fold relative to the NC level, log rank=0.106).

**Table S1.** The raw Ct values of the four miRNAs; miR-429, miR-22-3p, miR-30e-5p and miR-134 in qRT-PCR.

|      | miR-429 | miR-22-3p | miR-30e-5p | miR-134 | RNU48   |
|------|---------|-----------|------------|---------|---------|
| NC1  | 35.6194 | 36.0284   | 32.9235    | 38.7864 | 28.2512 |
| NC2  | 34.9088 | 34.5062   | 31.905     | 36.5567 | 28.0654 |
| NC3  | 35.0792 | 35.5222   | 33.0462    | 40.0402 | 28.9279 |
| NC4  | 33.108  | 32.5424   | 28.558     | 35.3352 | 25.9662 |
| NC5  | 31.8176 | 31.9984   | 28.2134    | 35.124  | 25.9693 |
| NC6  | 31.8434 | 30.6019   | 28.0193    | 33.7342 | 25.3862 |
| NC7  | 31.958  | 30.9524   | 27.9674    | 33.6194 | 25.6319 |
| NC8  | 31.4093 | 30.9948   | 27.6805    | 33.4887 | 26.0858 |
| NC9  | 31.2039 | 31.3464   | 27.5375    | 34.7339 | 25.9096 |
| NC10 | 31.6921 | 32.5901   | 28.5012    | 36.2628 | 26.4863 |
| SC1  | 35.4753 | 33.4558   | 32.0598    | 37.0972 | 29.0995 |
| SC2  | 34.3647 | 33.7261   | 30.9392    | 36.5686 | 28.2271 |
| SC3  | 36.5253 | 32.1762   | 31.0593    | 35.4272 | 29.1032 |
| SC4  | 35.6502 | 33.0023   | 30.8245    | 36.4153 | 27.4095 |
| SC5  | 36.3948 | 34.4291   | 32.9173    | 37.7454 | 27.9413 |
| SC6  | 36.7658 | 35.0731   | 32.7915    | 37.1187 | 28.6151 |
| SC7  | 34.2492 | 32.9288   | 32.1745    | 36.1594 | 28.9434 |
| SC8  | 35.5502 | 34.6208   | 32.1178    | 37.7513 | 27.7439 |
| SC9  | 37.3381 | 35.2128   | 32.627     | 39.7753 | 31.3014 |
| SC10 | 37.5998 | 34.3053   | 31.8896    | 37.2478 | 28.758  |
| SC11 | 37.9254 | 33.2053   | 34.675     | 37.534  | 33.8586 |
| SC12 | 35.7365 | 34.6571   | 32.0692    | 36.8814 | 27.9727 |
| SC13 | 33.8695 | 33.7125   | 31.6509    | 37.6317 | 28.5701 |
| SC14 | 35.5075 | 33.9484   | 30.7397    | 37.6819 | 27.8992 |
| SC15 | 36.5944 | 35.6236   | 31.4479    | 37.5159 | 26.977  |
| SC16 | 35.7901 | 33.7757   | 31.8785    | 39.4768 | 28.1803 |
| SC17 | 34.0229 | 32.1617   | 30.4541    | 36.5288 | 27.4306 |
| SC18 | 35.5399 | 34.1112   | 32.1383    | 37.7576 | 28.6078 |
| SC19 | 34.8933 | 33.8795   | 31.2241    | 36.7799 | 27.5466 |
| SC20 | 36.3161 | 34.1531   | 31.8117    | 36.4544 | 28.8415 |
| SC21 | 37.1602 | 37.0679   | 32.2451    | 37.7124 | 27.2818 |
| SC22 | 36.6555 | 35.8797   | 32.1848    | 36.4827 | 29.1135 |
| SC23 | 33.8795 | 34.2959   | 30.6723    | 36.2581 | 28.013  |
| SC24 | 35.3584 | 35.06     | 30.8827    | 38.7138 | 27.7891 |
| SC25 | 37.0713 | 36.776    | 33.1444    | 37.046  | 29.136  |
| SC26 | 34.057  | 36.6007   | 30.4949    | 38.1788 | 29.2255 |
| SC27 | 34.561  | 35.2636   | 31.3935    | 36.8518 | 29.3621 |
| SC28 | 37.1145 | 35.8167   | 33.0278    | 38.3018 | 29.6281 |
| SC29 | 34.6491 | 34.649    | 31.7993    | 37.1677 | 28.2865 |
| SC30 | 34.4681 | 34.3809   | 30.6304    | 35.6724 | 27.6759 |
| SC31 | 35.2929 | 34.9749   | 31.622     | 36.2524 | 28.405  |
| SC32 | 35.2335 | 34.3534   | 30.411     | 35.4592 | 27.1257 |
| SC33 | 34.4037 | 34.5537   | 30.7372    | 35.9118 | 28.2281 |
| SC34 | 34.5418 | 34.1358   | 31.4159    | 35.0333 | 27.9968 |
| SC35 | 34.9178 | 32.7735   | 29.9282    | 36.9877 | 28.8369 |
| SC36 | 34.55   | 32.7765   | 31.1598    | 35.974  | 27.5771 |
| SC37 | 34.6352 | 33.5325   | 31.5421    | 36.1326 | 27.1543 |

|      |            |            |            |            |            |
|------|------------|------------|------------|------------|------------|
| SC38 | 32.7878    | 35.004     | 31.2815    | 37.5626    | 28.585     |
| SC39 | 35.5761    | 33.9275    | 31.2467    | 35.121     | 27.0385    |
| SC40 | 35.3531    | 34.6572    | 31.9969    | 36.7403    | 26.3656    |
| SC41 | 33.6452    | 34.4645    | 31.9726    | 36.3306    | 27.4277    |
| SC42 | 34.2729    | 33.1531    | 30.349     | 34.3513    | 27.3681    |
| SC43 | 33.7383    | 33.4094    | 28.8688    | 36.1641    | 26.4971    |
| SC44 | 35.5667    | 35.4266    | 33.1724    | 36.5489    | 27.0157    |
| SC45 | 36.31      | 36.7207    | 30.6364    | 37.0213    | 26.9056    |
| SC46 | 34.5593    | 35.3229    | 31.3986    | 37.0229    | 26.5615    |
| SC47 | 34.2796    | 35.8951    | 29.9375    | 36.7316    | 27.481     |
| SC48 | 37.2295    | 35.0969    | 31.4372    | 36.0206    | 27.5863    |
| SC49 | 32.1307    | 34.2424    | 28.1451    | 37.3768    | 27.8187    |
| SC50 | 34.9401    | 36.471     | 30.1247    | 36.1739    | 26.9582    |
| SC51 | 34.0884    | 35.4675    | 28.8927    | 35.119     | 26.2956    |
| SC52 | 36.2062    | 35.7569    | 31.3157    | 35.4265    | 28.2071    |
| SC53 | 32.3572    | 35.513     | 28.4821    | 39.3183    | 27.9311    |
| SC54 | 35.4441    | 34.5361    | 31.2622    | 36.4608    | 27.1503    |
| SC55 | 36.187     | 36.5611    | 32.2848    | 37.4604    | 27.757     |
| SC56 | 36.8786    | 33.6784    | 32.9563    | 37.5315    | 31.7894    |
| SC57 | 35.3186    | 33.5913    | 31.4287    | 36.8219    | 28.1748    |
| SC58 | 35.3707    | 33.7652    | 31.0659    | 39.0965    | 28.0657    |
| SC59 | 39.8837    | 33.0823    | 30.5531    | 42.3547    | 27.2781    |
| SC60 | 34.4337    | 32.1431    | 29.4809    | 34.047     | 26.3728    |
| SC61 | 34.5531    | 32.2276    | 29.7342    | 37.2904    | 27.2539    |
| SC62 | 35.077     | 32.3587    | 30.384     | 36.3579    | 27.1762    |
| SC63 | 35.457     | 32.9293    | 30.3934    | 36.3415    | 27.4601    |
| SC64 | 36.5454    | 33.2578    | 30.7413    | 37.6306    | 28.8319    |
| SC65 | 35.4751    | 32.0257    | 30.5624    | 37.6018    | 28.1872    |
|      | 35.02±1.62 | 34.11±1.47 | 31.00±1.47 | 36.79±1.49 | 27.89±1.33 |

NC, normal tissue; SC, squamous cell carcinoma; RNU48, control

**Table S2.** Clinicopathologic characteristics of 56 patients with cervical squamous cell carcinoma, including 29 patients without metastasis and 27 patients with metastasis.

|                                |           | <b>Patients</b> | <b>Non-metastasis</b> | <b>Metastasis</b> |
|--------------------------------|-----------|-----------------|-----------------------|-------------------|
| <b>Age (yr)</b>                |           | 47.9±11.8       | 47.8±11.2             | 48.0±21.6         |
| <b>HPV</b>                     | absent    | 1               | 1                     | 0                 |
|                                | low risk  | 1               | 1                     | 0                 |
|                                | high risk | 54              | 27                    | 27                |
| <b>Stage</b>                   | I         | 27              | 19                    | 8                 |
|                                | II        | 29              | 10                    | 15                |
|                                | III       | 3               | 0                     | 3                 |
|                                | IV        | 1               | 0                     | 1                 |
| <b>Nodal metastasis</b>        | absent    | 31              | 29                    | 2                 |
|                                | present   | 25              | 0                     | 25                |
| <b>Lymphovascular invasion</b> | absent    | 14              | 13                    | 1                 |
|                                | present   | 42              | 16                    | 26                |
| <b>Distant metastasis</b>      | absent    | 50              | 29                    | 21                |
|                                | present   | 6               | 0                     | 6                 |
| <b>Recurrence</b>              | absent    | 42              | 29                    | 13                |
|                                | present   | 14              | 0                     | 14                |
| <b>Total</b>                   |           | 56              | 29                    | 27                |
